# Supplementary material
Source: Springer Nature journal article supplement (https://www.springermedizin.de/resource/supplementary/12884_2012_763_MOESM1_ESM.pdf/9458148)
Supplement: MOESM1 [file 9458148]

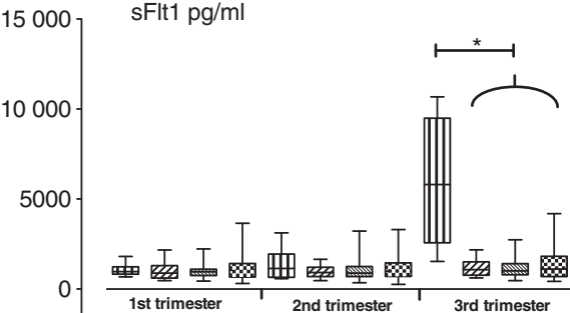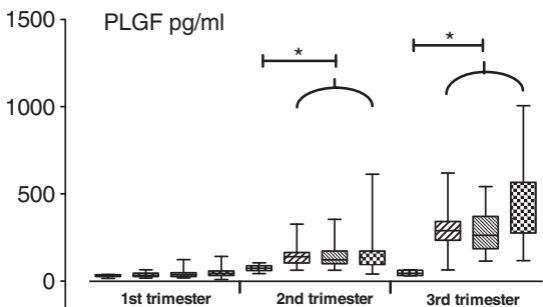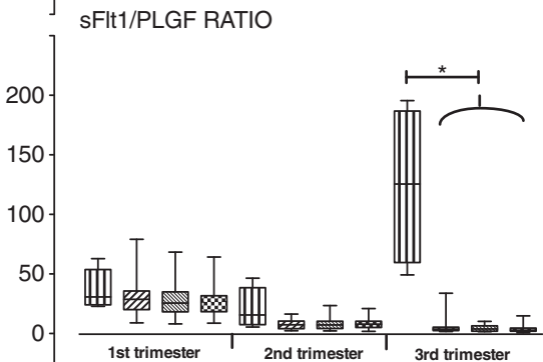

- ▨ Early-onset pre-eclampsia
- ▧ Late-onset pre-eclampsia
- ▩ Controls with risk factors
- ▣ Healthy controls

\* P<0.05
